# Supplementary material for: Middle East Respiratory Syndrome Coronavirus Intra-Host Populations Are Characterized by Numerous High Frequency Variants
Source: PLOS journal article supplement (doi:10.1371/journal.pone.0146251), 2016-01-20
Supplement: S1 (10.1371/journal.pone.0146251.s001) [file journal.pone.0146251.s001]

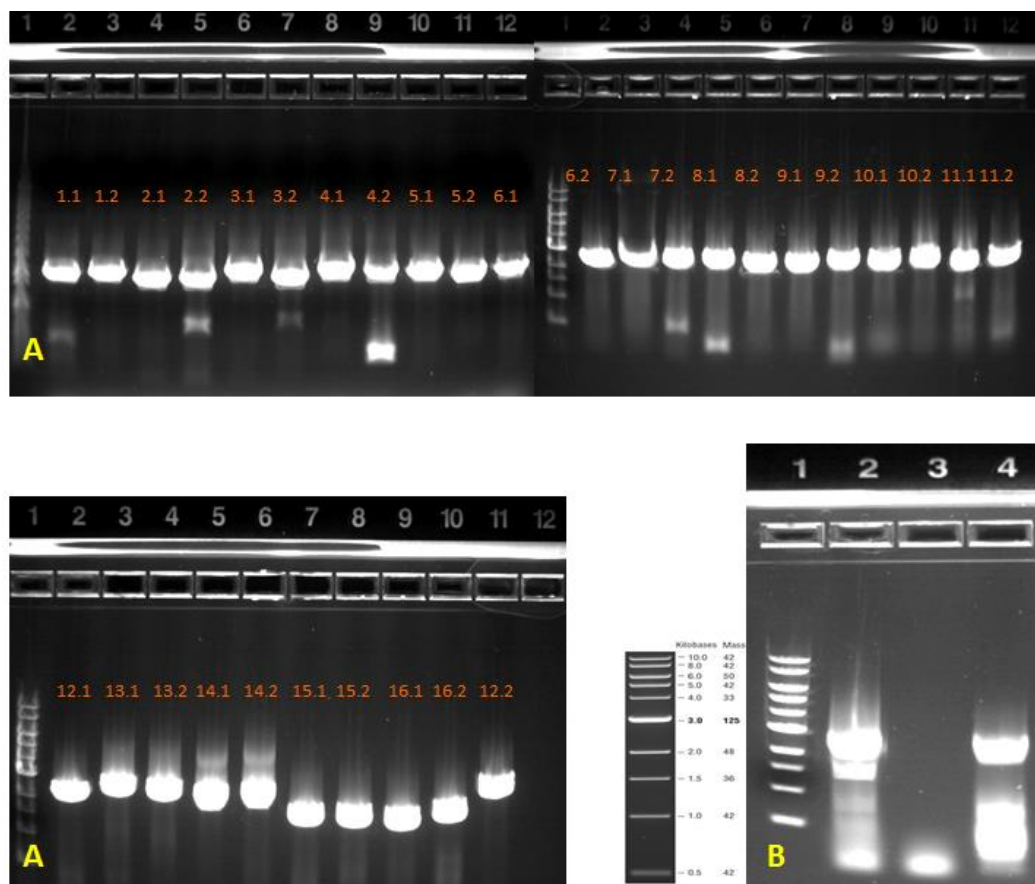

**S1 Figure. PCR amplification of MERS-CoV (strain EMC/2012) using primers tested as individual reactions (A) and in two multiplexed reactions (B).** (A) Primer sets are listed above each gel product. (B). Multiplex products include bands of expected size, as well as smaller bands and primer dimers.
